# Supplementary material for: Transcription Factor TCF7L2 Genetic Study in the French Population
Source: Oxford University Press journal article supplement (doi:10.2337/db06-0474), 2006-09-26
Supplement: pg2903onlineappendix.doc [file pg2903onlineappendix.doc]

| Supplementary Table 1  Quantitative traits (means ± SD) by *TCF7L2* genotype within control individuals | | | | |
| --- | --- | --- | --- | --- |
|
| Quantitative trait | C/C | C/T | T/T | *P* value |
| BMI (kg / m²) | 22.83 ± 2.27 | 22.87 ± 2.31 | 22.75 ± 2.25 | 0.76 |
| Fasting Insulinemia (pmol / L) | 39.17 ± 19.01 | 38.08 ± 25.79 | 35.56 ± 19.64 | **0.08** |
| HOMA-B (no unit) | 73.09 ± 54.07 | 69.69 ± 52.87 | 67.24 ± 42.76 | 0.18 |
| HOMA-IR (no unit) | 1.26 ± 0.67 | 1.23 ± 0.88 | 1.15 ± 0.69 | 0.12 |
| Fasting Glycemia (mmol / L) | 5.11 ± 0.47 | 5.12 ± 0.48 | 5.09 ± 0.49 | 0.68 |
| Glycated hemoglobin (%) | 5.21 ± 0.40 | 5.22 ± 0.38 | 5.19 ± 0.35 | 0.62 |
| Cholesterol (mmol / L) | 5.67 ± 0.95 | 5.64 ± 0.93 | 5.67 ± 0.95 | 0.65 |
| Cholesterol / HDL (mmol / L) | 1.72 ± 0.42 | 1.73 ± 0.44 | 1.74 ± 0.46 | 0.86 |
| Cholesterol / LDL (mmol / L) | 3.51 ± 0.90 | 3.47 ± 0.86 | 3.51 ± 0.88 | 0.67 |
| TG (mmol / L) | 0.99 ± 0.64 | 0.97 ± 0.58 | 0.96 ± 0.54 | 0.61 |

| Supplementary table 2 | |  |  |  |  |  |  |  |  |
| --- | --- | --- | --- | --- | --- | --- | --- | --- | --- |
| Genotypic distribution and odds ratios of rs7903146 and rs12255372 among control and Maghrebian T2D subjects | | | | | | | | |  |
| **SNP/genotype** | **Frequency** | | | | **Allelic OR [95% CI]** | | | ***P* value** |  |
|  | Control (N) | All T2D from the Maghreb (N) | Nonobese T2D from the Maghreb (N) | |  | | |  |  |
| rs7903146 |  |  |  | |  | | |  |  |
| C/C | 1208 | 68 | 35 | | Controls *vs* all Maghrebian T2D: **1.66 [1.35-2.03]** | | | 8.1 x 10-7 |  |
| C/T | 1060 | 106 | 53 | |  | | |  |  |
| T/T | 231 | 35 | 25 | | Controls *vs* nonobese Maghrebian T2D: **1.91 [1.46-2.50]** | | | 1.6 x 10-6 |  |
| **MAF (%)** | **30.5** | **42.1** | **45.6** | |  | | |  |  |
|  |  |  |  | |  | | |  |  |
| rs12255372 |  |  |  | |  | | |  |  |
| G/G | 1243 | 74 | 37 | | Controls *vs* all Maghrebian T2D: **1.64 [1.34-2.02]** | | | 1.9 x 10-6 |  |
| G/T | 1031 | 99 | 56 | |  | | |  |  |
| T/T | 209 | 34 | 20 | | Controls *vs* nonobese Maghrebian T2D: **1.79 [1.37-2.35]** | | | 2.0 x 10-5 |  |
| **MAF (%)** | **29.2** | **39.9** | **42.5** | |  | | |  |  |
| Nonobese T2D is a subgroup of all T2D (BMI < 30 kg/m²) | | | | |  | | |  |  |
| MAF: Minor allele frequency | | | |  |  | | |  |  |
| All the control individuals are of European origin | | | |  |  | | |  |  |
| The genotypic distributions for both variants are in Hardy-Weinberg equilibrium | | | | | | |  |  |  |

| Supplementary table 3 | |  |  |  |  |  |  |  |  |
| --- | --- | --- | --- | --- | --- | --- | --- | --- | --- |
| Genotypic distributions and odds ratios of rs7903146 and rs12255372 among control and T2D subjects of European origin | | | | | | | | |  |
| **SNP/genotype** | **Frequency** | | | | **Allelic OR [95% CI]** | | | ***P* value** |  |
|  | Control (N) | All T2D of European origin (N) | Non obese T2D of European origin (N) | |  |  |  |  |  |
| rs7903146 |  |  |  | |  | | |  |  |
| C/C | 1208 | 719 | 361 | | Controls *vs* all European T2D: **1.69 [1.56-1.84]** | | | 1.2 x 10-33 |  |
| C/T | 1060 | 1043 | 591 | |  | | |  |  |
| T/T | 231 | 396 | 250 | | Controls *vs* nonobese European T2D: **1.90 [1.72-2.10]** | | | 2.5 x 10-36 |  |
| **MAF (%)** | **30.5** | **42.5** | **45.4** | |  | | |  |  |
|  |  |  |  | |  | | |  |  |
| rs12255372 |  |  |  | |  | | |  |  |
| G/G | 1243 | 784 | 406 | | Controls *vs* all European T2D: **1.60 [1.46-1.74]** | | | 1.9 x 10-26 |  |
| G/T | 1031 | 1032 | 576 | |  | | |  |  |
| T/T | 209 | 339 | 222 | | Controls *vs* nonobese European T2D: **1.78 [1.61-1.97]** | | | 2.4 x 10-29 |  |
| **MAF (%)** | **29.2** | **39.7** | **42.4** | |  | | |  |  |
| Nonobese T2D is a subgroup of all T2D (BMI < 30 kg/m²) | | | | |  | | |  |  |
| MAF: Minor allele frequency | | | |  |  | | |  |  |
| All the control and T2D individuals are of European origin | | | |  |  | | |  |  |
| The genotypic distributions for both variants are in Hardy-Weinberg equilibrium | | | | | | |  |  |  |
